# Supplementary material for: Synthesis and characterization of quantum dot–polymer composites
Source: Royal Society of Chemistry journal article supplement (doi:10.1039/b820204d), 2009-01-01
Supplement: b820204d.pdf [file b820204d.pdf]

*Supporting Materials*

**Synthesis and characterization of highly fluorescent quantum dots-polymer  
nanocomposites**

Joe Weaver,<sup>1</sup> Rashid Zakeri,<sup>1a</sup> Samir Aouadi,<sup>2</sup> and Punit Kohli<sup>1</sup>

<sup>1</sup>Departments of Chemistry and Biochemistry, and <sup>2</sup>Physics

Southern Illinois University

Carbondale, IL 62901

<sup>1a</sup> Present address: Department of Chemistry, Indiana University, Bloomington, IN

47405

Email: [pkohli@chem.siu.edu](mailto:pkohli@chem.siu.edu)

| Standards                 | $Q_y$ | Conditions for Q.Y. Measurement | Excitation [nm] |
|---------------------------|-------|---------------------------------|-----------------|
| Fluorescein               | 95    | 0.1 M NaOH                      | 496             |
| Rhodamine 6G              | 94    | Water                           | 488             |
| Rhodamine B <sup>1b</sup> | 31    | Water                           | 514             |

**Table 1S:** Quantum yield standards.<sup>1a</sup>

We estimate the Raman peak position,  $\lambda_R$ , using the following formula:<sup>2</sup>

$$\lambda_R = \lambda_{ex}/(1-\lambda_{ex} \Delta\nu) \quad [1]$$

where  $\lambda_{ex}$  is excitation peak,  $\Delta\nu$  is Raman wavelength shift for the solvent ( $\sim 3020 \text{ cm}^{-1}$ )<sup>3</sup>.

Table 2S shows comparison of calculated and observed Raman peaks for three different excitation wavelengths. There is an excellent agreement between calculated and observed Raman peak positions.

| $\lambda_{ex}$ (nm)           | 400 | 390 | 410 |
|-------------------------------|-----|-----|-----|
| Calculated peak position (nm) | 455 | 442 | 468 |
| Observed peak position (nm)   | 454 | 441 | 468 |

**Table 2S.** Observed and calculated Raman peak positions for three excitation wavelengths.

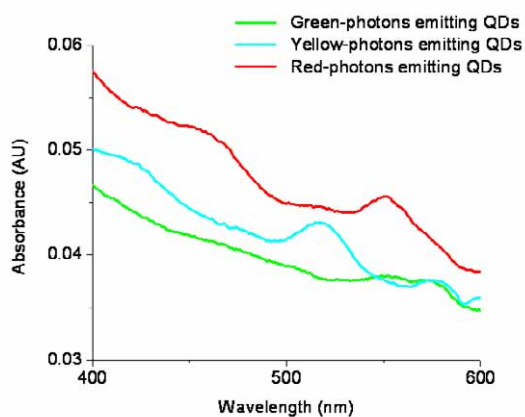

**Figure 1S.** Electronic absorption spectrum of three different QDs. See text for more details.

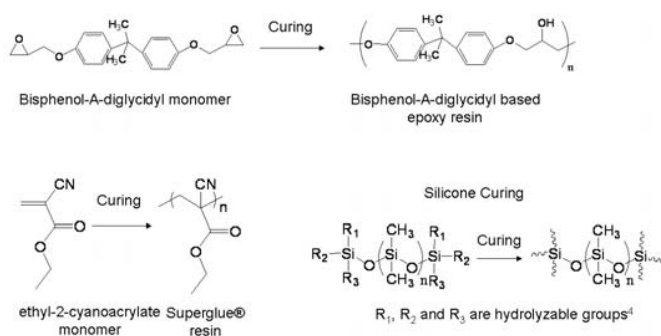

**Scheme 1S.** General curing reactions of three polymers used in this study.

## References.

1. (a) Lakowicz, J. R. Principles of Fluorescence Spectroscopy 2006, Springer, NY, page 54. (b) Magde, D.; Rojas, G. E.; Seybold, P. *Photochem. Photobiol.* **1999**, *70*, 737.
2. Ingle, J. D.; Crouch, S. R. Spectrochemical Analysis, 1988, Prentice Hall, NJ, page 463.
3. Parker, C. A. *The Analyst* **1959**, *84*, 446-453.
4. Silicon Compounds: Silanes and Silicones, Eds. Arkles, B. and Larson, G.; Gelest Inc. Morrisville, PA.
